# Supplementary material for: The interaction of compliance and activation on the force-length operating range and force generating capacity of skeletal muscle
Source: bioRxiv or medRxiv preprint supplement (doi:10.1101/580027), 2019-03-20
Supplement: Supplementary file [file media-1.pdf]

1     **The interaction of compliance and activation on the force-length operating**  
2             **range and force generating capacity of skeletal muscle**

3     S.M. Cox<sup>1\*</sup>, K.L. Easton<sup>2,3</sup>, M. Cromie Lear<sup>4,5</sup>, R.L. Marsh<sup>3,6</sup>, S.L. Delp<sup>5,7</sup>, J. Rubenson<sup>1</sup>

<sup>1</sup>Biomechanics Laboratory, Kinesiology Department, The Pennsylvania State University,  
University Park, PA 16802, USA;

<sup>2</sup>School of Sport Science, Exercise and Health, The University of Western Australia, Perth, WA,  
6009, Australia

<sup>3</sup>Department of Biology, Northeastern University, Boston, MA, USA

<sup>4</sup>Seismic Inc., Menlo Park, CA, 94025, USA

<sup>5</sup>Department of Mechanical Engineering, Stanford University, Stanford, CA, 94305, USA

<sup>6</sup>Department of Ecology and Evolutionary Biology, Brown University, Providence, RI, 02912,  
USA

<sup>7</sup>Departments of Bioengineering and Orthopedic Surgery, Stanford University, Stanford, CA,  
94305, USA

## 5 **Supplementary Material: Model Development**

### 6 **Glossary**

|    |                                               |            |
|----|-----------------------------------------------|------------|
| 7  | Joint Coordinate System                       | JCS        |
| 8  | Bone Technical Coordinate Systems             | B-TCS      |
| 9  | Bone Anatomical Coordinate System             | B-ACS      |
| 10 | Global Coordinate System                      | GCS        |
| 11 | Optimal fiber length adjusted pennation angle | $\theta_0$ |
| 12 | Tendon Slack Length                           | $L_{ts}$   |
| 13 | Average sarcomere length                      | $L_s$      |
| 14 | Average fascicle length                       | $L_f$      |
| 15 | Optimal fiber length                          | $L_0$      |
| 16 | Tarsometatarsus-phalangeal                    | TMP        |

17

### 18 **Animals**

19 Complete muscle-tendon paths, bone geometry and muscle architecture measurements were made  
20 on one guinea fowl specimen (1.45 kg body mass) to construct a generic musculoskeletal model  
21 of the pelvic limb. Four additional animals ( $1.46 \pm 0.1$  kg; mean  $\pm$  SD) were used to compare  
22 general muscle and tendon properties (muscle mass, fiber length, pennation angle, tendon length  
23 and mass). Experimental moment arm measurements were performed on two animals (1.55 kg;  
24 1.49 kg) for ankle and tarsometatarsus-phalangeal (TMP) muscles and on four animals ( $1.59 \pm 0.1$   
25 kg; mean  $\pm$  SD; taken from Carr et al., 2011) for the moment arm of the knee extensors (patella)  
26 and hip extensor muscle (the ILPO; see muscle abbreviations Table S1). These experimental

27 moment arms were compared to those predicted by the model. *In vivo* passive joint moment  
28 experiments were performed on four animals ( $1.55 \pm 0.2$  kg; mean  $\pm$  SD) and compared to the  
29 generic model predictions. Two animals (1.43 kg; 1.49 kg) were used to measure tendon elastic  
30 modulus. Animal experiments were performed under protocols approved by the Northeastern  
31 University Institutional Animal Care and Use Committee (NU IACUC) and all specimens used  
32 only for anatomical measurements were obtained post euthanasia from NU IACUC approved  
33 protocols. The model specimen and the additional muscle architecture specimens were transferred  
34 to Stanford University Neuromuscular Biomechanical Laboratory for model development.

### 35 **3D muscle-tendon paths**

36 The model animal pelvic limb was skinned and divided down the mid-line of the pelvis. The  
37 right limb was kept fresh/frozen while the left limb was fixed in 10% neutral buffered formalin  
38 in a posture representing the mid-swing of gait. The three-dimensional (3D) paths of the muscle-  
39 tendon units of the fresh/frozen limb were digitized using an optical tracking system (Polaris,  
40 Northern Digital, Waterloo, ON) using a protocol similar to that of Hutchinson et al. (Hutchinson  
41 et al. 2015) (for a list of muscle-tendon-units incorporated in the model see Table S1). A passive  
42 retro-reflective three-marker digitizing probe was used to identify the 3D location of points on  
43 the specimen relative to an active LED-emitting marker cluster serving as the Global Coordinate  
44 System (GCS) (AdapTrax trackers; Traxal Inc., Toronto, ON). Because the LED-emitting  
45 cluster was too large to place directly into the specimen bones, it was rigidly mounted on a frame  
46 that could also clamp the specimen securely in place. Before each muscle tendon path was  
47 digitized, Bone Technical Coordinate Systems (B-TCS) were identified by digitizing three small  
48 non-collinear holes made in each bone (for a flow chart of spatial transformations used in the  
49 construction of the musculoskeletal model see Fig. S1). For the pelvis, the B-TCS points were

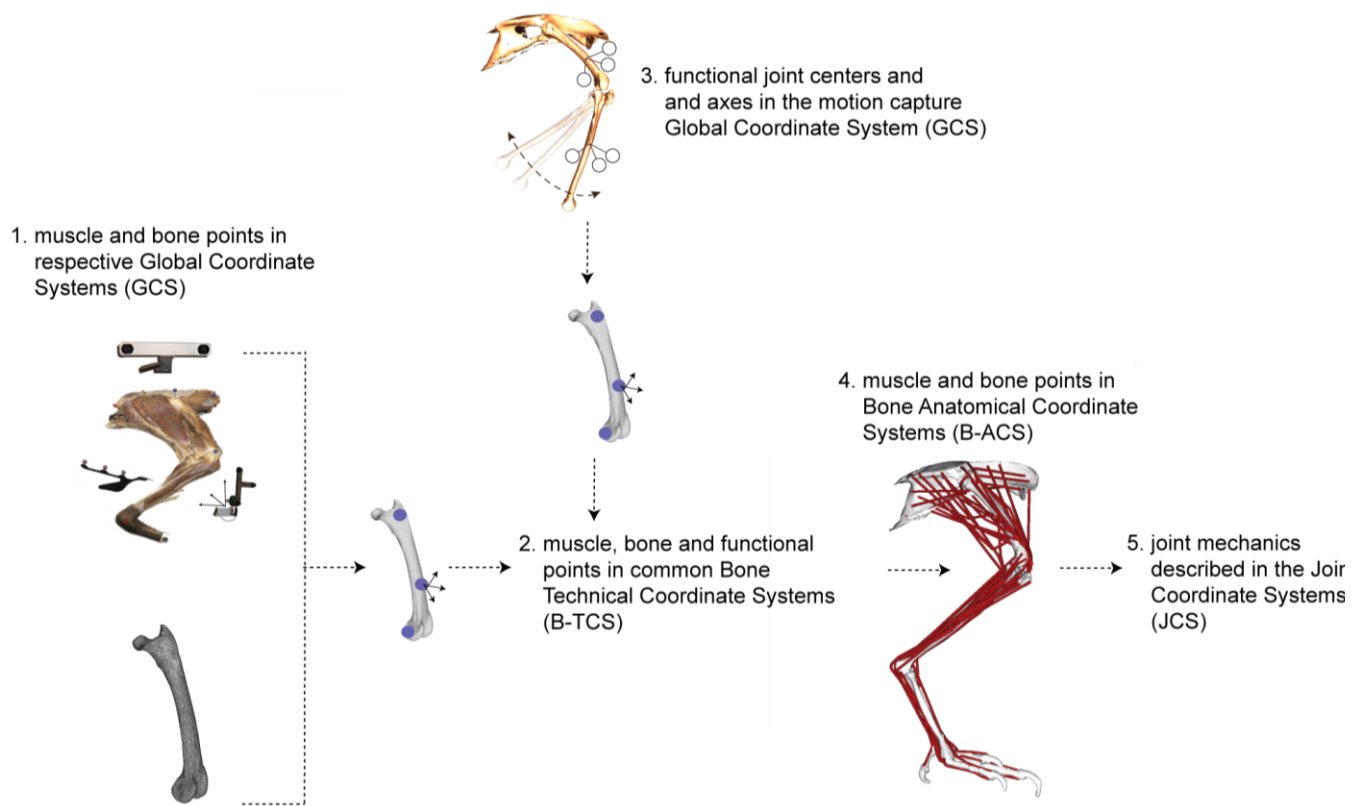

**Figure S1.** Flow chart for converting bone and muscle points collected in instrument Global Coordinate Systems (GCS) into the Bone Anatomical Coordinate Systems (B-ACS) used to define the Joint Coordinate System (JCS).

50 anatomically relevant landmarks that were also used to construct the pelvis Bone Anatomical  
 51 Coordinate System (B-ACS; see below and Table S2; Fig. S2). B-TCSs were identified for the  
 52 bones on which the muscle originated and inserted and any bones that the muscle crossed. If the  
 53 specimen needed to be repositioned in the frame, new B-TCSs points were taken. When tracking  
 54 the muscle-tendon paths, special care was taken to identify the origin and insertion of the muscle  
 55 and any anatomical features constraining the muscle-tendon path. After digitizing the muscle-  
 56 tendon paths, the points relative to the GCS were transformed into the relevant B-TCSs using  
 57 MATLAB (The MathWorks, Natick, MA). One exception to the use of B-TCSs was for the  
 58 tendon paths on the phalanges. For these, it was found to be more accurate to define the muscle  
 59 points based off of the bone geometry directly, guided by careful dissection.

60 For muscles with broad origins and/or  
 61 insertions, or for those muscles with a  
 62 complex architecture (e.g. multi-pennate  
 63 muscles), we divided the muscle into  
 64 multiple (2-3) muscle lines of action (see  
 65 Table S1)<sup>‡</sup>. In these cases, the architecture  
 66 of the muscle was measured and computed  
 67 separately for each line of action (see  
 68 below). Some muscles of the guinea fowl  
 69 have branched tendons that insert on  
 70 separate limb segments. For example, the  
 71 flexor digitorum longus (FDL) muscle  
 72 inserts on the distal phalanx of digit II, III  
 73 and IV. For these muscles we generated  
 74 ‘cloned’ muscles for each tendon branch.  
 75 The cloned muscles have identical muscle  
 76 architecture, but different tendon paths.<sup>‡</sup>  
 77 See Table 1 for details.

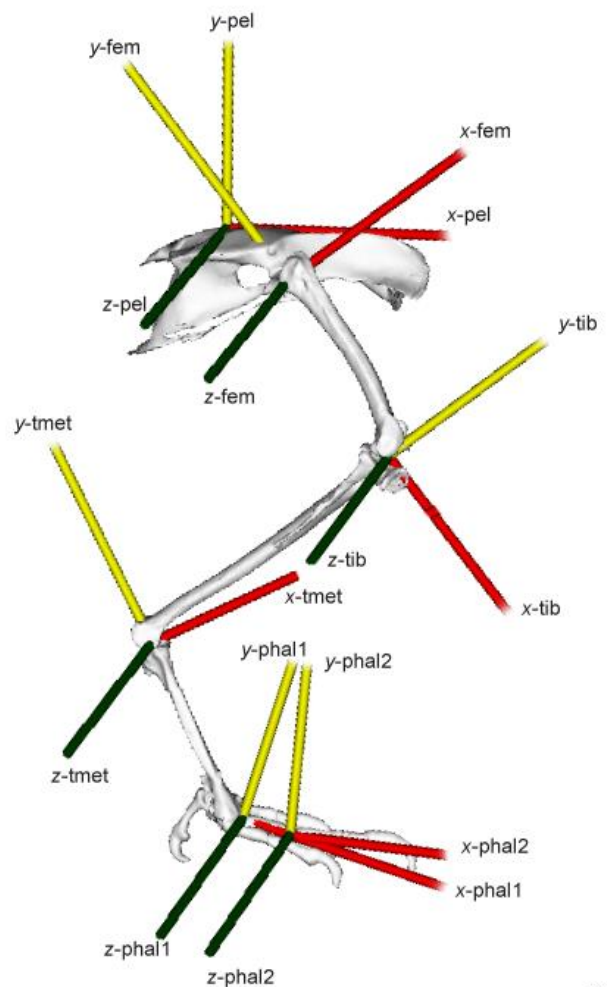

**Figure S2.** Graphical representation of Bone Anatomical Coordinate Systems (B-ACS) for the pelvis (pel); femur (fem); tibiotalarsus (tib); tarsometatarsus (tmet); proximal phalanx (phal1); and distal phalanx (phal2).

<sup>‡</sup> Note that care should be taken when choosing how the multiple lines of action for single muscles and cloned muscles are used in muscle-tendon or joint mechanics simulations. Optimization-based simulations using multiple lines of action for muscles might, in some cases, result in solutions that are not physiologically plausible. For example, vastly different activation patterns/levels across lines of action might not be physiologically feasible if separate neural innervation of the muscle regions (lines of action) are not present. Multiple cloned muscles should typically not be used together since doing so will double the size of the actual muscle. Choosing which cloned muscle to use will depend on the specific modeling performed (for example, which digit kinematics are tracked). For most modelling we recommend using the muscle clone that inserts on digit III since this digit is typically used in kinematic analyses. The data reported in the accompanying manuscript uses the digit III muscle clones. For muscles that insert only on digit II and IV, we recommend constraining digit II and digit III kinematics to the TMP.

78 **Table S1.** Muscle names, abbreviations and description. Muscles with superscript ‘C’ demotes a ‘cloned’ muscle for  
79 each tendon branch. For ‘clone’ muscles the underlined muscle is the one used for analysis in the accompanying  
80 manuscript. Muscles with superscript ‘M’ demotes a muscle divided into multiple lines of action. (Some muscles of  
81 the guineafowl pelvic limb have been omitted. We do not include the caudofemoralis pars caudalis because we did  
82 not model the tail vertebrae. We also do not include the fibularis brevis, a small muscle with a tendon crossing  
83 lateral to the ankle, and other small digital extensors originating on the tarsometatarsus).

| <b>Muscle Name</b>                                          | <b>Abbreviation</b>                         | <b>Description</b>                                                                             |
|-------------------------------------------------------------|---------------------------------------------|------------------------------------------------------------------------------------------------|
| <b>Ambiens</b>                                              | AMB                                         |                                                                                                |
| <b>Caudofemoralis pars pelvica</b>                          | CFP                                         |                                                                                                |
| <b>Extensor Digitorum Longus<sup>C</sup></b>                | EDL_ii<br><u>EDL_iii</u><br>EDL_iv          | inserts on digit ii<br><u>inserts on digit iii</u><br>inserts on digit iv                      |
| <b>Femerotibialis intermedius<sup>M</sup></b>               | FTI_l<br>FTI_m                              | lateral<br>medial                                                                              |
| <b>Femerotibialis lateralis pars distalis</b>               | FTLD                                        |                                                                                                |
| <b>Femerotibialis lateralis pars proximalis<sup>M</sup></b> | FTLP_l<br>FTLP_m                            | lateral<br>medial                                                                              |
| <b>Femerotibialis medialis<sup>M</sup></b>                  | FTM_p<br>FTM_m<br>FTM_d                     | prox<br>mid<br>distal                                                                          |
| <b>Fibularis longus<sup>C</sup></b>                         | <u>FL_p</u><br>FL_l                         | <u>runs posterior to ankle joint</u><br>runs lateral to ankle joint                            |
| <b>Flexor cruris medialis</b>                               | FCM                                         |                                                                                                |
| <b>Flexor cruris lateralis pars accessoria</b>              | <u>FCLP_c</u>                               | <u>includes the combined pars pelvica and pars accessoria muscles</u>                          |
| <b>Flexor cruris lateralis pars pelvica</b>                 | FCLP_p                                      | only isolated pars pelvica                                                                     |
| <b>Flexor digitorum longus<sup>C</sup></b>                  | FDL_ii<br><u>FDL_iii</u><br>FDL_iv          | inserts on digit ii<br><u>inserts on digit iii</u><br>inserts on digit iv                      |
| <b>Flexor hallucis longus<sup>C</sup></b>                   | FHL_h<br>FHL_ii<br><u>FHL_iii</u><br>FHL_iv | inserts on hallux<br>inserts on digit ii<br><u>inserts on digit iii</u><br>inserts on digit iv |
| <b>Flexor perforans et perforatus digiti II</b>             | DFII_s                                      | superficial; crosses knee                                                                      |
| <b>Flexor perforans et perforatus digiti III</b>            | DFIII_s                                     | superficial; crosses knee                                                                      |
| <b>Flexor perforatus digiti II<sup>M</sup></b>              | DFII_d<br>DFII_dx                           | deep; does not cross knee<br>deep; crosses knee                                                |
| <b>Flexor perforatus digiti III<sup>M</sup></b>             | DFIII_d<br>DFIII_dx                         | deep; does not cross knee<br>deep; crosses knee                                                |
| <b>Flexor perforatus digiti IV</b>                          | DFIV_s                                      | superficial; crosses knee                                                                      |
| <b>Gastrocnemius intermedia</b>                             | IG                                          |                                                                                                |
| <b>Gastrocnemius lateralis</b>                              | LG                                          |                                                                                                |
| <b>Gastrocnemius medialis<sup>M</sup></b>                   | MG_l<br>MG_c<br>MG_m                        | lateral<br>center<br>medial                                                                    |
| <b>Iliofemoralis externus</b>                               | IFE                                         |                                                                                                |

|                                                                  |                              |                                                                    |
|------------------------------------------------------------------|------------------------------|--------------------------------------------------------------------|
| <b>Iliofibularis</b> <sup>M</sup>                                | IF_p<br>IF_a                 | posterior<br>anterior                                              |
| <b>Iliotibialis cranialis</b> <sup>M</sup>                       | IC_cr<br>IC_cd               | cranial<br>caudal                                                  |
| <b>Iliotibialis lateralis pars postacetabularis</b> <sup>M</sup> | ILPO_cr<br>ILPO_m<br>ILPO_cd | cranial<br>mid<br>caudal                                           |
| <b>Iliotibialis lateralis pars preacetabularis</b> <sup>M</sup>  | ILPR_cr<br>ILPR_cd           | cranial<br>caudal                                                  |
| <b>Iliotrochantericus pars caudalis</b> <sup>M</sup>             | ITC_v<br>ITC_d               | ventral<br>dorsal                                                  |
| <b>Iliotrochantericus pars cranialis</b>                         | ITCR                         |                                                                    |
| <b>Iliotrochantericus pars medialis</b>                          | ITM                          |                                                                    |
| <b>Ischiofemoralis</b> <sup>M</sup>                              | ISF_v<br>ISF_d               | ventral<br>dorsal                                                  |
| <b>Obturatorius medialis</b> <sup>M</sup>                        | OM_v<br>OM_d                 | ventral<br>dorsal                                                  |
| <b>Pubo-ischio-femoralis pars medialis</b> <sup>M</sup>          | PIFM_cd                      | caudal                                                             |
| <b>Pubo-ischio-femoralis pars lateralis</b> <sup>M</sup>         | PIFL_cr<br>PIFL_cd           | cranial<br>caudal                                                  |
| <b>Tibialis cranialis</b> <sup>M</sup>                           | TC_f<br>TC_t                 | muscle head inserts on femur<br>muscle head inserts on tibiotarsus |

84

## 85 **Bone and Joint Coordinate Systems**

86 Bone Anatomical Coordinate Systems (B-ACS) were generated for each bone from bone  
87 landmarks and functional joint centers and axes of rotation. The range of motion of the knee,  
88 ankle, and tarsometatarsus-phalangeal (TMP; digit III) joints of the fresh/frozen limb were tracked  
89 as they were cycled through flexion/extension using a 10-camera motion capture system (Vicon  
90 MX100; 200Hz; Oxford Metrics, Oxford, UK). Clusters of three retro-reflective markers were  
91 attached to the femur, tibia, tarsometatarsus and the first phalange of digit III using a small bone  
92 pin, allowing the relative 3D position and orientation of the adjacent segments to be determined.  
93 An average helical flexion/extension axis was computed for the knee, ankle and TMP using the  
94 techniques outlined in (Besier et al. 2003) and (Rubenson et al. 2007). The digitizing probe was  
95 used to identify the medial and lateral boundaries of the joint and used to establish the functional  
96 joint center along the helical axis (see Rubenson et al. 2007). The helical axes and joint centers

97 were initially expressed in the segment cluster coordinate systems. The helical axes and joint  
 98 centers, together with anatomical landmarks digitized in the motion capture session were used in  
 99 the construction of the B-ACSs. Digitized landmarks included the synsacrum, sulcus, ilium,  
 100 pubis and the acetabulum center for the pelvis. Other digitized landmarks included the medial  
 101 and lateral points of the knee, ankle, TMP and interphalangeal joint (IP, digit III) joints and the  
 102 medial and lateral points of the end of the third phalange of digit III. The details of how the  
 103 functional and anatomical coordinates were used in the construction of the B-ACS are outlined in  
 104 Table S2 and displayed graphically in Figure S2. The B-TCS points were also digitized in the  
 105 motion capture trials relative to the marker clusters. This step allowed both muscle-tendon paths  
 106 and bone geometry to be translated from the B-TCSs into the B-ACSs (see Figs. S1&2).

107 **Table S2:** Description of Bone Anatomical Coordinate Systems (B-ACS).

| Segment         | B-ACS definition                                                                                                                                                                                                            | Landmark definitions                                                                                                                                             |
|-----------------|-----------------------------------------------------------------------------------------------------------------------------------------------------------------------------------------------------------------------------|------------------------------------------------------------------------------------------------------------------------------------------------------------------|
| Pelvis          | <b>origin:</b> SUL<br><b>x-axis:</b> unit vector from SUL to IL (+ cranial)<br><b>y-axis:</b> cross product of x-axis and unit vector from PUB to SYN (+ dorsal)<br><b>z-axis:</b> cross product of x-axis and y-axis       | HJC: hip joint center<br>SUL <sup>1</sup> : Sulcus<br>IL <sup>2</sup> : ilium<br>PUB: caudal end of pubis                                                        |
| Femur           | <b>origin:</b> HJC<br><b>y-axis:</b> unit vector from KJC to HJC (+ proximal)<br><b>z-axis:</b> cross product of y-axis and unit vector from MKHA to LKHA (+ lateral)<br><b>x-axis:</b> cross product of y-axis and z-axis. | HJC: hip joint center<br>KJC: knee joint center<br>MKHA: medial knee helical axis endpoint<br>LKHA: lateral knee helical axis endpoint                           |
| Tibiotarsus     | <b>origin:</b> KJC<br><b>y-axis:</b> unit vector from AJC to KJC (+ proximal)<br><b>z-axis:</b> cross product of y-axis and unit vector from MKHA to LKHA (+ lateral)<br><b>x-axis:</b> cross product of y-axis and z-axis. | KJC: knee joint center<br>AJC: ankle joint center<br>MKHA: medial knee helical axis endpoint<br>LKHA: lateral knee helical axis endpoint                         |
| Tarsometatarsus | <b>origin:</b> AJC<br><b>y-axis:</b> unit vector from TMP to AJC (+ proximal)<br><b>z-axis:</b> cross product of y-axis and unit vector from MAHA to LAHA (+ lateral)<br><b>x-axis:</b> cross product of y-axis and z-axis. | AJC: ankle joint center<br>TMP: tarsometatarsus-phalangeal joint center<br>MAHA: medial ankle helical axis endpoint<br>LAHA: lateral ankle helical axis endpoint |



|                      |                                                                                                                                                                                                                           |                                                                                                                                                                            |
|----------------------|---------------------------------------------------------------------------------------------------------------------------------------------------------------------------------------------------------------------------|----------------------------------------------------------------------------------------------------------------------------------------------------------------------------|
| Proximal<br>Phalanx* | <b>origin:</b> TMP<br><b>x-axis:</b> unit vector from TMP to IP (+ cranial)<br><b>z-axis:</b> cross product of y-axis and unit vector from MTHA to LTHA (+ lateral)<br><b>x-axis:</b> cross product of x-axis and z-axis. | TMP: tarsometatarsus-phalangeal joint center<br>IP: inter-phalangeal joint center<br>MAHA: medial ankle helical axis endpoint<br>LAHA: lateral ankle helical axis endpoint |
| Distal<br>Phalanx*   | <b>origin:</b> IP<br><b>x-axis:</b> unit vector from IP to PHAL (+ cranial)<br><b>z-axis:</b> cross product of y-axis and unit vector from MTHA to LTHA (+ lateral)<br><b>x-axis:</b> cross product of x-axis and z-axis. | IP: inter-phalangeal joint center<br>PHAL: distal end of digit<br>MAHA: medial ankle helical axis endpoint<br>LAHA: lateral ankle helical axis endpoint                    |

<sup>1</sup>Sulcus; caudal end of the prominent ridge on the midline of the dorsal aspect of the postacetabular ilium.

<sup>2</sup>Ilium; cranial aspect of the ilium, where it meets the sixth thoracic vertebrae

\*The B-ACS is the same for digit II, III and IV based on respective TMP and IP joint centers

---

108

109 The musculoskeletal model uses a non-orthogonal Joint Coordinate System convention (JCS)  
110 whereby each joint's motion is expressed by three ordered rotations (Grood and Suntay 1983):  
111 The first rotation is about the proximal segment's BCS z-axis (flexion/extension rotation); the  
112 last rotation is about the distal segment's BCS y-axis (the internal/external rotation rotation); the  
113 second rotation is about a floating axis that is perpendicular to the first and last rotation axes (the  
114 abduction/adduction rotation). The rotation of the JCS is calculated from the rotation matrix of  
115 the distal BCS relative to the proximal BCS. Output muscle and joint moments and joint  
116 reaction forces from the model are expressed in the JCSs.

117

118 The model included two modifications from the standard JCS construction. First, the model  
119 incorporated translation between the tarsometatarsus and tibia BCSs as a function of the ankle  
120 flexion/extension rotation. This was necessary to describe the *in vivo* path of the bones during  
121 rotation. The bone translation was measured during motion capture trials and implemented in  
122 the SIMM joint modeling structure. Secondly, we modeled the patella-knee kinematics as a  
123 function of the knee flexion/extension rotation. This was achieved by digitizing the patella

124 location relative to the femur and tibia (B-ACSs) across the joints range of motion. The patella  
125 motion was similarly implemented in the SIMM joint modeling structure.

126

## 127 **Bone Geometry**

128 To visualize the bones in the model we generated high-resolution .ply models of the major leg  
129 and foot bones. After digitizing muscle tendon paths and performing the joint motion capture  
130 experiments bones of the right leg were de-fleshed and cleaned. The cleaned bones were  
131 scanned using a 3D scanner. The pelvis, femur, and tarsometarsus were scanned individually,  
132 and the phalangeal segments were scanned together. Bones scans were initially segmented using  
133 Mimics software (Materialise, Leuven, Belgium). The phalanges of the foot were separated in  
134 software by estimating the location of the center of rotation between adjacent segments. The 3D  
135 location of B-TCS points drilled in the bones (the anatomical landmarks making up the B-ACS  
136 in the case of the hip) were digitized in Blender software (Blender 2.4; blender.org; Amsterdam,  
137 The Netherlands). By knowing the translation matrix of the B-ACS in the B-TCS, the individual  
138 vertices of the bone files could be translated into the B-ACS (Figure S1, S2). This was  
139 performed in MATLAB. The patella was not individually scanned, so a small disc was modelled  
140 to represent the patella in the SIMM model on to which muscles attached.

141

## 142 **Muscle Architecture**

143 The right limb of the model specimen and other muscle architecture specimens were used to  
144 measure muscle and tendon mass and length. The left limbs were formalin-fixed in a mid-swing  
145 posture and used for muscle fiber length, sarcomere length and pennation angle measurements.

146 Muscle and free tendon masses were recorded (nearest 0.1 mg). Free tendon length was  
147 measured using a digital caliper. A small bundle of fascicles were dissected free from the fixed  
148 muscles and their length was measured (nearest 0.1mm) taking into account fascicle curvature.  
149 We performed three fascicle length measurements per muscle (or muscle sub-unit). Sarcomere  
150 lengths in each fascicle bundle was measured from second harmonic generation using two-  
151 photon laser microendoscopy (see Cromie et al. 2013 for a detailed description of the technique).  
152 Briefly, near infrared light at a wavelength of 960 nm (Titanium:Sapphire laser; Chameleon,  
153 Coherent, Santa Calra, CA) directed at the fascicle bundles interacted with the myosin-  
154 containing A-band of the sarcomeres allowing them to be imaged at high resolution. Sarcomere  
155 lengths were calculated from the recorded second harmonic generated images by determining the  
156 spatial frequency in the sarcomere pattern's two-dimensional discrete Fourier transform (Cromie  
157 et al. 2013) with a custom MATLAB script. Sarcomere lengths were measured over 100 frames  
158 of stable images. We measured sarcomere lengths at three locations along the muscle fascicle.  
159 The average computed sarcomere lengths ( $L_s$ ) and the average fascicle lengths ( $L_f$ ) were  
160 combined to compute the optimal fiber length ( $L_0$ ) using the known optimal sarcomere length  
161 (2.36  $\mu\text{m}$ ) of guinea fowl muscle (Carr, Ellerby, and Marsh 2011):

$$162 \quad L_0 = L_f \cdot 2.36 / L_s \quad (\text{Eq. S1})$$

163 Pennation angle of the fixed muscle was measured by first cutting into the muscle to better  
164 identify the fascicle orientation relative to the tendon line of action. Pennation angles were  
165 measured under magnification using a protractor. The cross-sectional area ( $CSA$ ) of the muscle  
166 (or muscle sub-unit) was calculated from the optimal fiber length ( $L_0$ ), muscle mass ( $m_{mus}$ ) and  
167 assumed density ( $\rho_{mus}$ , 0.00106  $\text{g}/\text{mm}^3$ ) according to equation S2.

168  $CSA = \frac{m_{mus}}{\rho_{mus} \cdot L_0}$  (Eq. S2)

169 Maximal isometric force for each muscle (or muscle sub-unit) was calculated using a specific  
170 tension of 0.3 N/mm<sup>2</sup>.

171

## 172 **Tendon properties**

173 The free common tendon from the lateral, medial and intermedius gastrocnemius muscles  
174 (Achilles), and the free tendon from the tibialis cranialis, digital flexor-IV (Flexor perforatus  
175 digiti IV) and extensor digitorum longus were used to establish a generic elastic modulus for  
176 tendon in the model. Material properties were measured on representative tendons from a  
177 combination of two animals using a linear material testing instrument (Bose EnduraTEC,  
178 EElectroForce 3200, Framingham, MA, USA). The ends of the tendons were clamped using  
179 electronically cooled tissue grips and the tendon section between the clamps was wrapped in  
180 cellophane to retain moisture. The displacement of the grips was increased until the tendon first  
181 generated measurable force (0.25 N) and then shortened by 0.002 mm to set the tendon  
182 segment's slack length ( $L_{ts}$ ). The tendon was programmed to undergo a 5Hz sinusoidal cycle to  
183 for a duration of 20s. This cycle frequency resulted in a stretch-shorten cycle that approximated  
184 the duration of the stance phase / swing phase of gait. The clamp displacement was  
185 programmed such that peak force reached the estimated peak *in vivo* isometric force produced by  
186 the muscle (see Muscle Architecture section above) and was established from an initial slow  
187 ramped tendon stretch. The tendons displayed creep in force typically over the first 5 cycles.  
188 After creep dissipated, 5 stretch-shorten cycles were selected for analysis. Tendon strain was  
189 calculated as the displacement of the tendon divided by the tendon slack length. Tendon force

190 was subsequently normalized by the estimated peak isometric force of the muscle. From the  
191 resulting strain-normalized force plots we selected data at 10 locations starting at 0 strain and  
192 ending at peak strain that captured the shape of the curve (Fig. S3 inset). These were used to set  
193 the spline control points in SIMM and OpenSim to predict tendon strain based on simulated  
194 muscle force. Muscle-specific spline control points were used for the gastrocnemius muscles,  
195 the tibialis cranialis, digital flexor-IV and extensor digitorum longus in the model. We generated  
196 a ‘generic’ tendon by averaging the four individual sets of spline control points and used these  
197 for all other muscles in the model. Because the tendon strain – force curve was normalized to  
198 peak muscle force the tendon properties scale to muscle strength in the model.

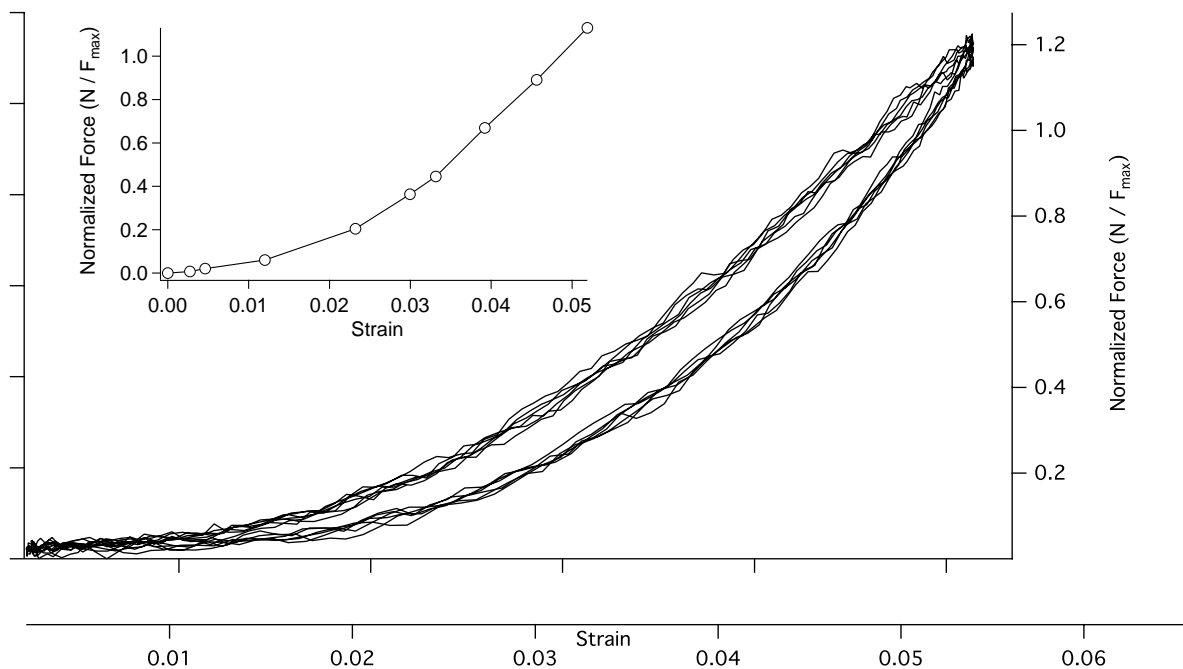

199 **Figure S3.** Example force-displacement plot of the extensor digitorum longus tendon (5 stretch-shorten  
cycles). Data is plotted as force vs. displacement and normalized force (force divided by the muscle's  
estimated maximum isometric force) vs. strain. The inset illustrates the control points used for the spline  
fit used in the SIMM and OpenSim modelling environment.

200

201 We also calculated the elastic modulus of the tendons. Tendon stress was calculated as the  
202 tendon force (N) divided by its cross sectional area ( $CSA_{ten}$ ;  $m^2$ ). Tendon cross sectional area  
203 was computed as:

$$204 \quad CSA_{ten} = \frac{m_{ten}}{\rho_{ten} \cdot L_{ts}}, \quad (\text{Eq. S3})$$

205 where  $m_{ten}$  is the mass of the tendon between the clamps (measured to the nearest 0.1 mg) and  
206  $\rho_{ten}$  is the density of tendon ( $0.00112 \text{ g/mm}^3$ ). Elastic modulus was computed as the slope of  
207 the ascending linear portion of the stress-strain curve after the tendon toe region. Tendon  
208 modulus is reported in Table S2.

209

| <b>Tendon</b>                    | <b>Modulus (GPa)</b> |
|----------------------------------|----------------------|
| <b>Gastroc. (Achilles)</b>       | 2.48                 |
| <b>Digital Flexor IV</b>         | 1.03                 |
| <b>Tibialis Cranialis</b>        | 0.44                 |
| <b>Extensor digitorum longus</b> | 0.47                 |
| <b>Generic</b>                   | 1.10                 |

**Table S2.** Tendon elastic modulus for the individual tendons tested and the average ‘generic’ tendon.

210

### 211 **Segment Moment of Inertia**

212 Because we could not empirically measure the segment inertial properties of our model specimen  
213 due to muscle dissections, these were predicted from a previous study on guinea fowl joint

214 mechanics (Rubenson and Marsh 2009) which reported the segment mass as a percentage of  
215 body mass, and the radius of gyration and location of the center of mass relative to segment  
216 lengths. We made a simple conversion of the center of mass location so that it was expressed  
217 relative to B-ACS with origins at the proximal joint. The moment of inertial about the ab-  
218 adduction axes of the segments (x-axes; y-axis for phalanges) were matched to the flexion-  
219 extension values (moment of inertia about the z-axes). The moment of inertia about the long-axis  
220 (y-axis) of the femur and other distal segments (x-axis for phalanges) were regarded as small and  
221 set to zero. The center of mass location in the segment z-axes (medio-lateral) were also set to  
222 zero.

223

#### 224 **Model construction in SIMM**

225 An overview of the model framework is presented in Figure 2 of the accompanying manuscript.  
226 Bone geometries and 3D muscle-tendon paths (in relevant B-ACSs) were initially populated in  
227 SIMM 6.0 software (Musculographics, Santa Clara, CA). The muscle tendon paths were defined  
228 using via points and wrapping surfaces to maintain correct muscle-tendon-unit paths over the  
229 joint range of motion. Wrapping surfaces and via points were informed from the experimentally  
230 digitized muscle-tendon paths. If required, the origin and insertion points were adjusted slightly  
231 so that they resided on the surface of the bone. To minimize discontinuities that result from  
232 inaccurate muscle wrapping calculations, muscle paths were edited to constrain the action of  
233 wrapping surfaces to between a set of waypoints. In some cases wrapping surfaces were adjusted  
234 slightly so that model moment arms were better representative of experimentally measured  
235 moment arms (see below).

236

237 Muscle optimal fiber lengths ( $L_0$ ),  $F_{\max}$  (based on  $CSA$  and a specific tension of  $0.3 \text{ N/mm}^2$ ),  
238 pennation angle and the tendon force-length curve were input into the SIMM Schutte muscle  
239 model. We used the standard SIMM normalized active and passive muscle force length curves  
240 (see below for customized activation-dependent active force length curves). Tendon slack length  
241 was solved for by constraining the simulated normalized passive muscle fiber length (at the joint  
242 posture of the fixed model specimen) to match the experimentally measured normalized fiber  
243 lengths. This step took into account the measured pennation angle of the muscle. Custom  
244 functions were generated for the ankle and patella kinematics using the SIMM joint editor.  
245 Finally, we converted the SIMM version of the model to OpenSim version 3.2 (SimTK,  
246 Stanford, CA).

#### 247 **FL Curve generation**

248 Activation dependent shifts of the force length curve were implemented in SIMM by creating  
249 distinct models with unique force length curves applied to all muscles for each activation level.  
250 Activation dependent shifted force length curves were calculated as described below.

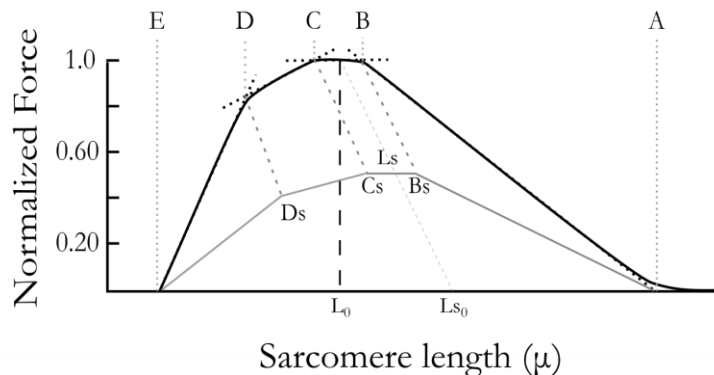

**Figure S4:** Landmarks of the sarcomere length-tension curve (A-E) were shifted as a function of activation (A, Bs, Cs, Ds, E) to generate activation dependent shifted sarcomere length-tension curve. Adapted from Gordon et al. 1966



251 Starting with previous published values for four limbs of the guinea fowl sarcomere length-  
252 tension curve (Carr, Ellerby, and Marsh 2011, E:[1.39,0], C:[2.26,1], B:[2.46,1], A:[3.86,0]), the  
253 landmarks of the curve (Gordon, Huxley, and Julian 1966) were shifted with activation level as  
254 follows. The length of the plateau was held constant and the relative position of the shift from  
255 steep to shallow portion of the ascending limb,  $D_s$ , is 60% of the distance between the myosin  
256 length,  $E$ , and the start of the plateau region,  $C_s$ . For two levels of activation-dependent shift (0  
257 and 0.15) and five activation levels (0,0.25,0.50,0.75,1), the x and y coordinates of the landmarks  
258 were calculated as:

$$\begin{aligned} 259 \quad L_{s0} &= [L_0*(1+S) , 0] \\ 260 \quad L_s &= [L_0*(1+S)*A , A] \\ 261 \quad C_s &= [L_{sx}-(B_x-C_x)/2 , A] \\ 262 \quad B_s &= [L_{sx}+(B_x-C_x)/2 , A] \\ 263 \quad D_s &= [(C_{sx}-E_x)*0.6 + E_x, L_{sy}*0.8) \end{aligned}$$

264  
265 where  $L_{s0}$  is the shifted optimal fiber length at no activation,  $L_s$  is the shifted optimal fiber  
266 length,  $C_s$  and  $B_s$  the start and end of the plateau region (Fig. S4).

267  
268 To account for non-uniform striation spacing, variability was added into the length-tension curve  
269 by adding +/- 0.05 jitter to x and y coordinates of points over 1000 iterations. These data were fit  
270 with a 5<sup>th</sup> order polynomial with 23 nodes and the resulting curve was normalized by the original  
271  $L_0$ . For each activation level, a new SIMM model was created with a new normalized force-  
272 length curve as described above.

273

274 **Experimental moment arm measurement**

275 To compare the model-generated muscle moment arms to experimental moment arms we  
276 performed tendon travel experiments for muscles from two representative anatomical specimens  
277 for the ankle and TMP muscles, and from four animals for the patella and hip muscle (ILPO)  
278 moment arms (see ‘Animals’ section above). These comparisons were used to check whether the  
279 model’s moment arms arising from input muscle-tendon paths and bone wrapping surfaces were  
280 representative (Figs. S5&6). In the case of the gastrocnemius tendon and tibialis cranialis  
281 tendon, we adjusted the bone wrapping surfaces in SIMM so that the shape of the moment-arm  
282 ankle angle curve provided a closer match to the experimental data. The methods for measuring

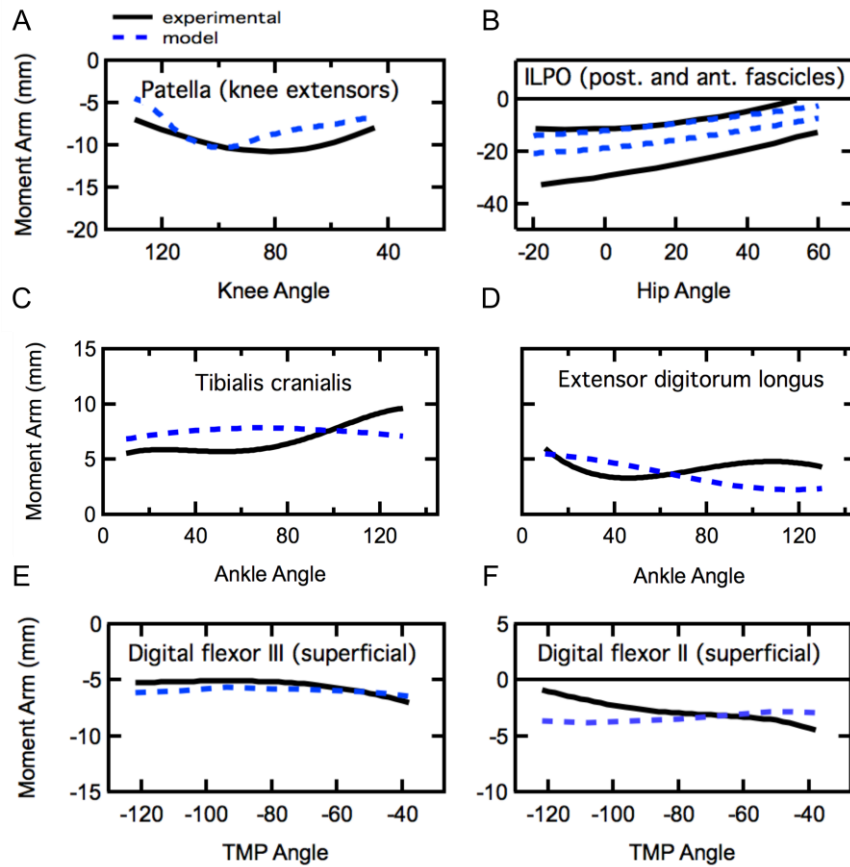

**Figure S5** Comparison of model generated moment arms and experimental moment arms for the patella (A), the anterior and posterior fascicles of the ILPO muscle (B), the ankle flexor muscles (C&D) and the TMP flexor muscles (E&F). Note, for the Digital flexor II muscle the moment arm about the TMP was computed from muscle length changes and joint angles while rotating the digit III.

283 tendon travel-based moment arms on guinea fowl muscle have been described previously (Carr,  
284 Ellerby, and Marsh 2011). Briefly, we combined simultaneous recordings of tendon length  
285 (Harvard Bioscience length transducer; Model 52-9511, Holliston, MA, USA; 1000 Hz) and  
286 joint angle (digital video; JVC model #GR-DVL9800; JVC, Wayne, NJ, USA; 60 Hz) as the  
287 ankle, knee or hip was rotated through its range of motion. The anatomical specimen and limb  
288 segments were kept stationary using bone clamps. For hip muscles, we clamped the femur and  
289 moved the pelvis segment; for knee muscles (patella tendon moment arm) we clamped the femur  
290 and moved the tibiotarsus; for ankle muscles we clamped the tibiotarsus and moved the  
291 tarsometatarsus. The individual muscles for which moment arms were measured are shown in  
292 Figures S5&6. For the gastrocnemius and digital flexor muscles the muscle tendon unit was left  
293 largely intact, with the origin of the muscles separated from the femur or tibiotarsus. These  
294 muscles were attached to the length transducer using silk suture with the proximal path of the  
295 muscle fibers constrained by a guide glued to the tibiotarsus and/or femur. To measure the  
296 moment arm of the patella tendon most of the muscle knee extensor muscle was dissected off but  
297 the joint capsules, articulating tissues and small muscles overlying the joints were left intact. The  
298 patella tendon was attached via a guide that maintained the *in vivo* path of the tendon over the  
299 articulating surfaces of the knee (Carr, Ellerby, and Marsh 2011). The proximal path of the  
300 suture was also constrained by guides attached to the femur to replicate the natural path of the  
301 knee extensor muscles. For the ILPO moment arm at the hip, the anterior and posterior fascicle  
302 paths were identified, after which the muscle was dissected off the pelvis. The fascicle paths  
303 were replicated using silk suture that was anchored at the pelvis origin and passed through guides  
304 glued to the femur to the length transducer. For all muscles, the length transducer lever was  
305 counterweighted to ensure that there was no slack in the suture and that any small strain in

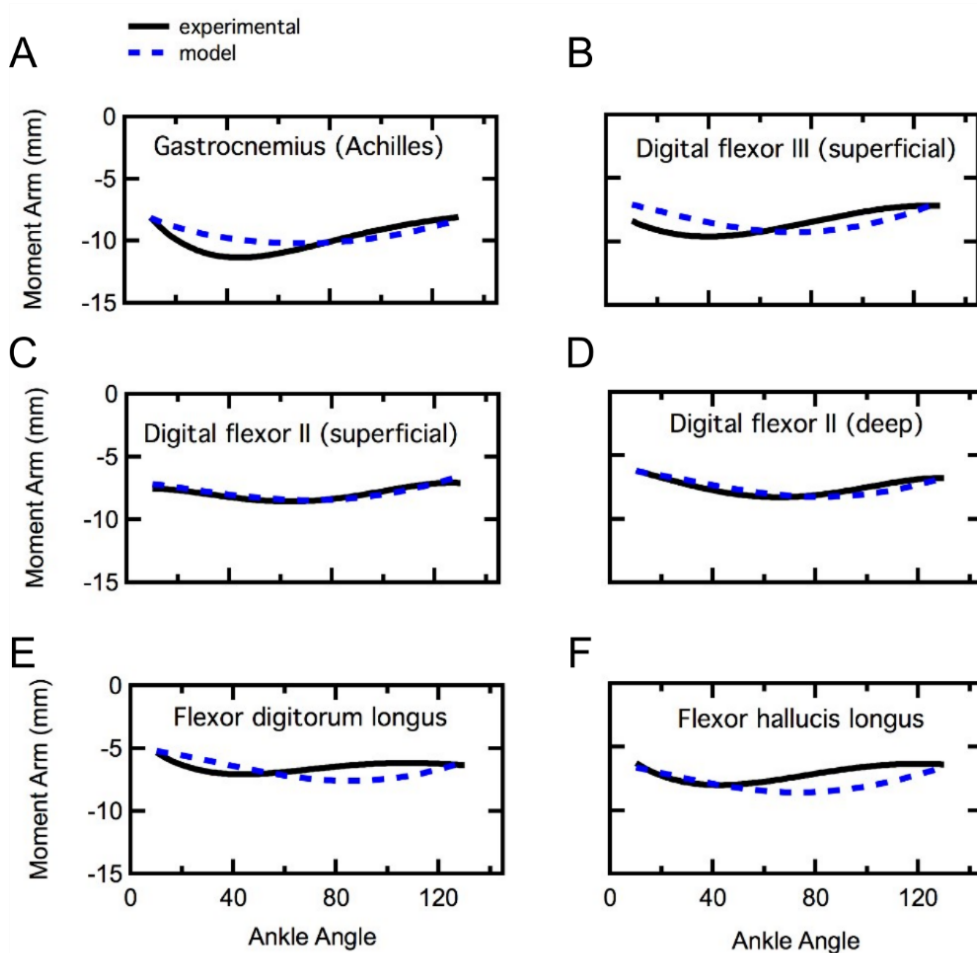

**Figure S6.** Comparison of model generated moment arms and experimental moment arms for the ankle extensor muscles.

306 tendon (for the ankle muscles) or suture was kept constant. The change in length of the muscle-  
 307 tendon path was recorded as the joint was rotated manually through its range of motion.

308

309 Planar joint angles were estimated by digitizing reflective markers placed cranially and caudally  
 310 on the pelvis and proximally and distally on the femur, tibiotarsus and tarsometatarsus (see  
 311 Rubenson and Marsh 2009). The joint center locations were also identified with a reflective  
 312 marker. Video recordings were synchronized with length data using a TTL pulse that turned on  
 313 an LED in the video field of view. Video data was auto digitized using the Mtrack2 plugin in

314 ImageJ (ImageJ; NIH, Wayne Rasband; <http://rsb.info.nih.gov/nih-image/>). Digitized video data  
315 was filtered and joint angles were computed using custom MATLAB scripts (MathWorks,  
316 Natick, MA, USA). The corresponding length data was filtered and down sampled to match the  
317 video data. The length-angle data were fitted with polynomials, the order of which were  
318 determined statistically (Carr, Ellerby, and Marsh 2011). These polynomials were subsequently  
319 analytically differentiated to yield a moment arm-joint angle equation for each muscle.

320

### 321 **Experimental passive joint moment measurement**

322 To further assess the accuracy of our model, we compared simulated net passive joint moments  
323 to experimental values. Passive joint moments were measured in four animals (see ‘Animals’  
324 section above) for the hip joint (proximal muscles) and ankle joint (distal muscles). Animals  
325 were deeply anesthetized (isoflurane, 1.5%) and core temperature maintained using a heating pad  
326 and warm-water sachets placed around the animal. Because the stretch reflex could influence  
327 joint moment recordings we also used a local nerve block (Bupivacaine, 0.5%; 5ml) to the pelvic  
328 limb nerve supply including the ischiadicus (sciatic) and femoralis nerves. We used a custom  
329 limb immobilization rig with the animal positioned on its side that allowed us to freely rotate the  
330 joint of interest while immobilizing the adjacent joints at set angles (Fig. S7). This was achieved  
331 by securing sliding aluminum brackets across the knee, ankle and TMP joints at specific joint  
332 angles using a turn-screw. The brackets were attached directly to the femur, tibia and  
333 tarsometatarsus using stainless steel screws secured into pre-drilled holes. The phalanges were  
334 positioned using a cable tie secured to the bracket. The hip joint was immobilized using a stage  
335 with plastic stops that secured the pelvis and femur in place.

336

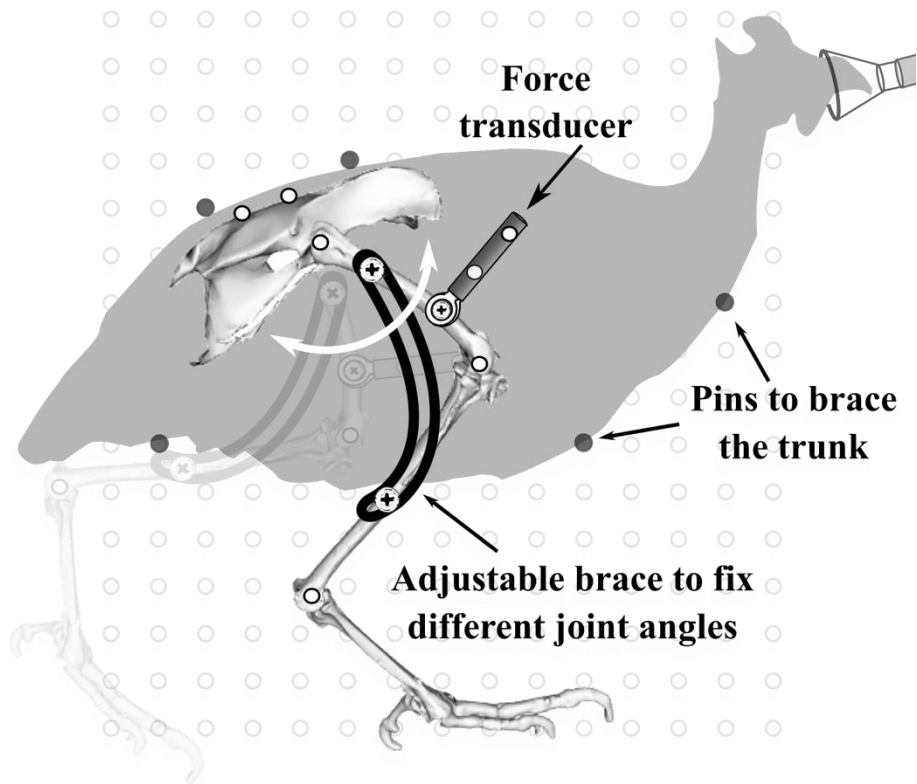

**Figure S7.** Experimental set-up for passive net joint moment measurements. Example shown for passive hip joint measurement. Also performed for ankle and TMP joints

337 We attached a single-axis compression/tension quartz force transducer (Kistler model 9203) to  
 338 the bone distal to the joint of interest using a stainless-steel mounting screw. The transducer was  
 339 positioned such that it was held horizontal and so that force applied to the bone segment through  
 340 the transducer was oriented parallel to the sagittal plane. The transducer was allowed to rotate  
 341 about its attachment point but was constrained to the sagittal plane (Fig. S7). The joint of interest  
 342 was held horizontal and rotated through its flexion/extension range of motion by pushing/pulling  
 343 the force transducer while preventing any other point of force application. Force was recorded  
 344 continuously (1000 Hz) using a USB A-to-D system (PowerLab, ADInstruments; Bella Vista,  
 345 Australia). The origin and orientation of the applied force transducer was identified by video  
 346 recording (60 Hz) a reflective marker positioned at the transducer attachment point and two

347 markers that defined the transducer axis (Fig. S7). The skeletal planar kinematics were recorded  
348 from reflective markers placed on joint centers and bone landmarks following the procedures  
349 published earlier (Rubenson and Marsh 2009). The force transducer and joint kinematics were  
350 synchronized using a TTL pulse that was recorded on a separate A-to-D channel and that  
351 simultaneously turned on an LED in the video field of view.

352

353 We performed passive joint moment experiments over the joints' range of motion with the  
354 adjacent joints set at flexed and extended positions (Figs. S9&10). Joint rotations were  
355 performed slowly to minimize acceleration-effects. Pilot experiments confirmed that joint  
356 rotation velocity did not greatly alter the passive joint moment profiles. We used an inverse  
357 dynamic approach to compute the net joint moments. Similar to moment arm calculations (see  
358 above), video data was auto digitized using the Mtrack2 plugin in ImageJ (ImageJ; NIH, Wayne  
359 Rasband; <http://rsb.info.nih.gov/nih-image/>) and synchronized with force data using a TTL pulse  
360 that turned on an LED in the video field of view. Digitized video data and force data were  
361 filtered (10 Hz Butterworth filter, MATLAB, The MathWorks, Natick, MA, USA). Joint angles  
362 and moments were computed similar to the procedure outlined in Rubenson and Marsh (2009)  
363 with two modifications to the inverse dynamic model. First, we implemented the external force  
364 from the force transducer at the point of attachment to the bone. Second, because the limb and  
365 force transducer were held horizontal, the force due to gravity was omitted from our calculations.  
366 Moment measurements from individual animals were normalized to body mass. Mean moments  
367 and standard deviation of the mean were computed from the four animals over the range of joint  
368 angles that were common to all animals. Comparisons of experimental and modelled net passive  
369 joint moments for the ankle and hip are presented below in Figures S9&10.

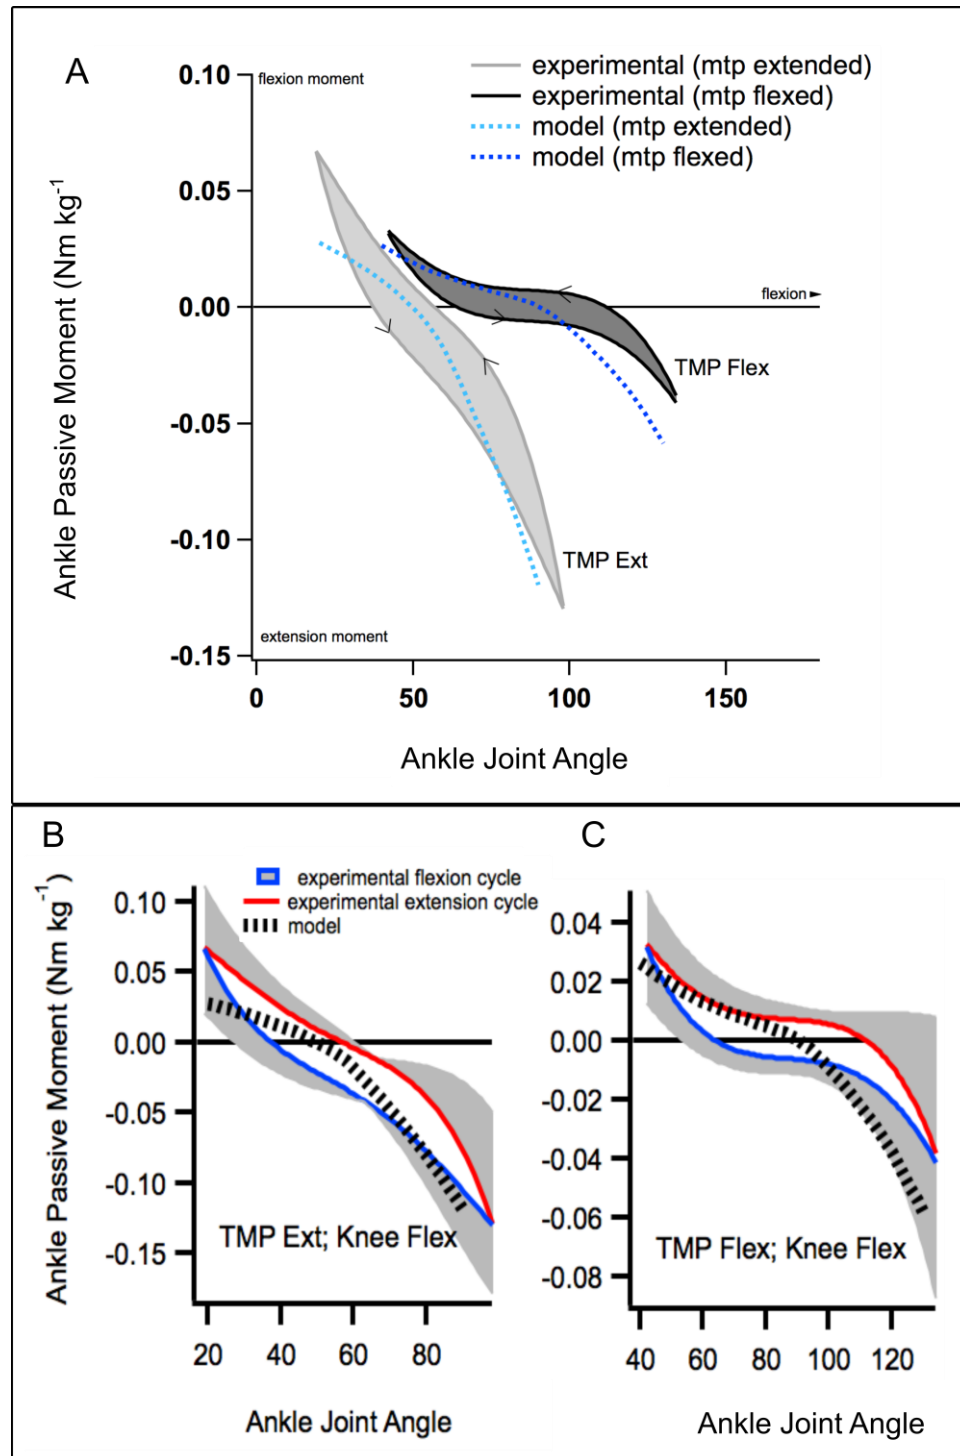

**Figure S9.** A) Mean passive moments about the ankle as a function of ankle angle, with the TMP joint set at a flexed position (stretching the digital extensor / ankle flexor muscles) and at an extended position (stretching the digital flexor/ ankle extensor muscles). The arrows on the moment curves represent the direction of joint rotation (the shaded region between flexion and extension cycles are included for visual clarity). Modeled moments are overlain for comparison. B&C) Mean passive moment data for the flexion and extension cycles including the standard deviation of the mean (grey shaded regions). Modeled moments are overlain for comparison.



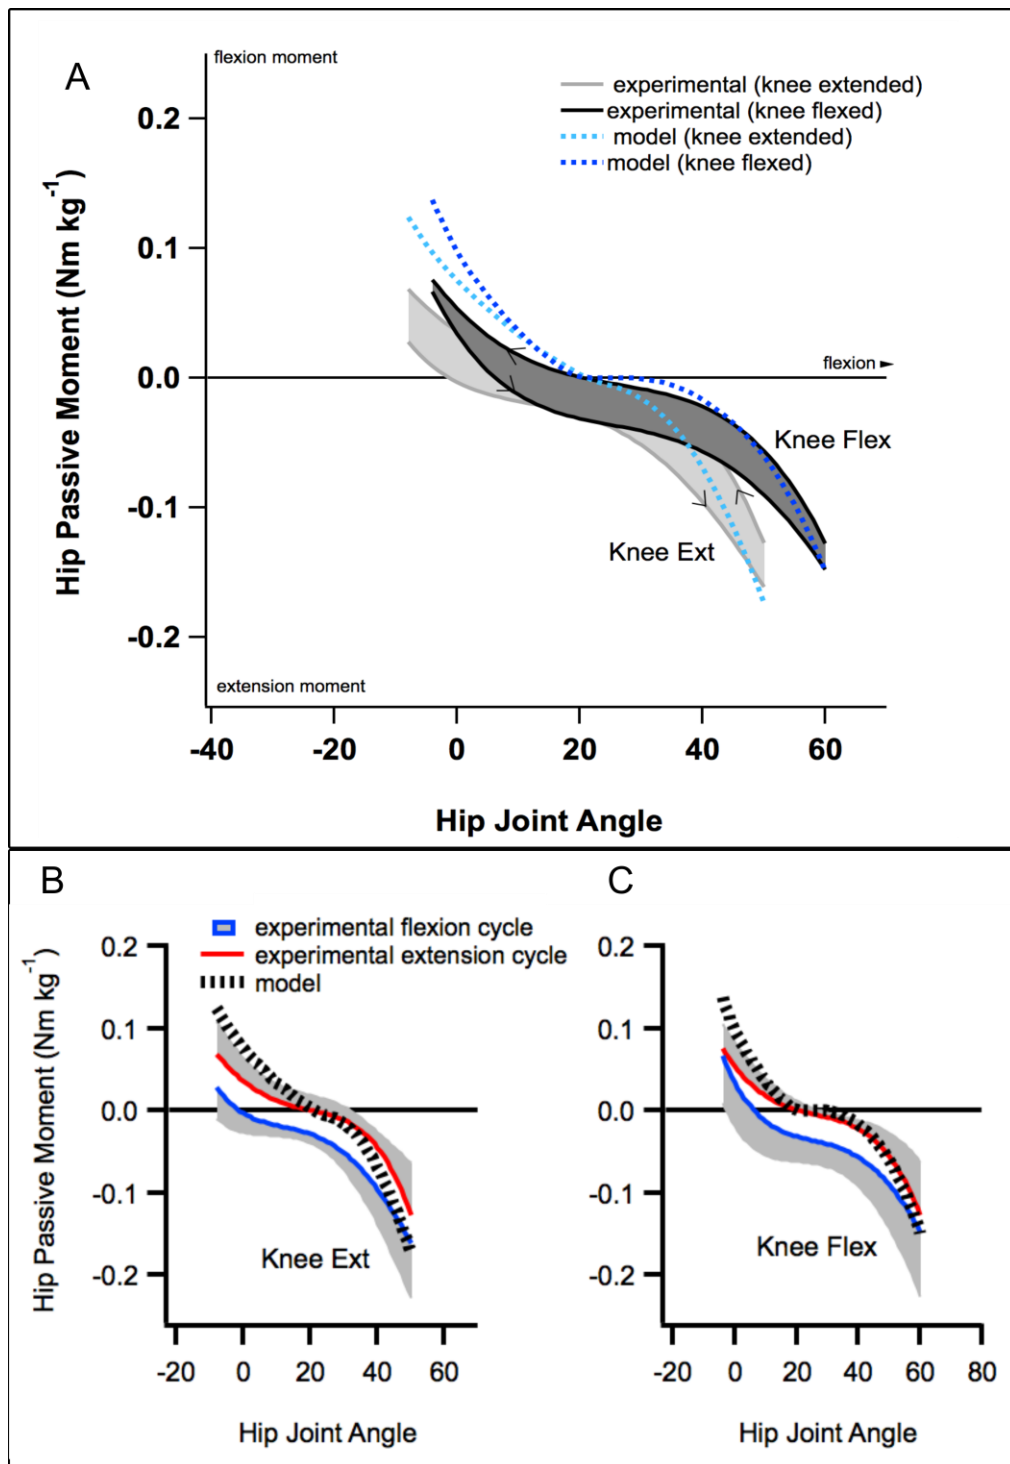

**Figure S10.** A) Mean passive moments about the hip as a function of hip angle, with the knee joint set at a flexed position (stretching the hip flexor muscles) and at an extended position (stretching the hip extensor muscles). The arrows on the moment curves represent the direction of joint rotation (the shaded region between flexion and extension cycles are included for visual clarity). Modeled moments are overlain for comparison. B&C) Mean passive moment data for the flexion and extension cycles including the standard deviation of the mean (grey shaded regions). Modeled moments are overlain for comparison.

372 **References**

- 373 Besier, Thor F, Daina L Sturnieks, Jacque A Alderson, and David G Lloyd. 2003. "Repeatability  
374 of Gait Data Using a Functional Hip Joint Centre and a Mean Helical Knee Axis." *Journal*  
375 *of Biomechanics* 36: 1159–68. [https://doi.org/10.1016/S0021-9290\(03\)00087-3](https://doi.org/10.1016/S0021-9290(03)00087-3).
- 376 Carr, Jennifer A, David J Ellerby, and Richard L Marsh. 2011. "Differential Segmental Strain  
377 during Active Lengthening in a Large Biarticular Thigh Muscle during Running." *Journal*  
378 *of Experimental Biology* 214 (Pt 20): 3386–95. <https://doi.org/10.1242/jeb.050252>.
- 379 Cromie, Melinda J., Gabriel N. Sanchez, Mark J. Schnitzer, and Scott L. Delp. 2013. "Sarcomere  
380 Lengths in Human Extensor Carpi Radialis Brevis Measured by Microendoscopy." *Muscle*  
381 *and Nerve* 48 (2): 286–92. <https://doi.org/10.1002/mus.23760>.
- 382 Gordon, a. M., a. F. Huxley, and F. J. Julian. 1966. "The Variation in Isometric Tension with  
383 Sarcomere Length in Vertebrate Muscle Fibres." *The Journal of Physiology* 184 (1): 170–  
384 92. <https://doi.org/5921536>.
- 385 Grood, E S, and W J Suntay. 1983. "A Joint Coordinate System for the Clinical Description of  
386 Three- Dimensional Motions : Application to the Knee 1." *Journal of Biomechanical*  
387 *Engineering* 105: 136–44.
- 388 Hutchinson, John R, Jeffery W Rankin, Jonas Rubenson, Kate H Rosenbluth, Robert A Siston,  
389 and Scott L Delp. 2015. "Musculoskeletal Modelling of an Ostrich (*Struthio Camelus*)  
390 Pelvic Limb: Influence of Limb Orientation on Muscular Capacity during Locomotion."  
391 *PeerJ* 3: e1001. <https://doi.org/10.7717/peerj.1001>.
- 392 Rubenson, Jonas, David G Lloyd, Thor F Besier, Denham B Heliamas, and Paul A Fournier.  
393 2007. "Running in Ostriches ( *Struthio Camelus* ): Three-Dimensional Joint Axes

394 Alignment and Joint Kinematics.” *Journal of Experimental Biology* 210: 2548–62.  
395 <https://doi.org/10.1242/jeb.02792>.

396 Rubenson, Jonas, and Richard L Marsh. 2009. “Mechanical Efficiency of Limb Swing during  
397 Walking and Running in Guinea Fowl ( *Numida Meleagris* ).” *Journal of Applied*  
398 *Physiology* 106 (1985): 1618–30. <https://doi.org/10.1152/japplphysiol.91115.2008>.

399
